# Supplementary material
Source: publisher site journal article supplement (http://www.spandidos-publications.com/2050/downloadSupplementary)
Supplement: Supplementary file 1 [file downloadSupplementary]

## Sheet: All data
ID	Diagnosis		Sex	Age at sampling	Family history of cancer	Smoking status	Radiotherapy	Neoadjuvant therapy	Adjuvant therapy	Hormonal therapy	TNM stage	Histopathological grade	Laterality	Non-small cell/Small cell	Bronchogenic/Pulmonal	Non-invasive/Invasive	Duktal/Lobular	ER	PR	HER2
ID			F=0, M=1		0=no, 1=yes	0=nonsmoker, 1=smoker, 10=exsmoker≥5years, 11=exsmoker<5years	0=no, 1=yes	0=no, 1=yes	0=no, 1=yes	0=no, 1=yes			left=0, right=1	0=non-small cell, 1=small cell	0=bronchogenic, 1=pulmonal, 2=mediastinum	0=non-invasive, 1=non-iv/inv, 2=invasive	0=ductal, 1=lobular, 2=ductolobular, 3=cystosarcoma	0=negative, 1=positive	0=negative, 1=positive	0=negative, 1=positive
1	Breast cancer		0	69	0	1	1	0	1	0	I	4	0			1		0	0	1
2	Breast cancer		0	61	1	0	1	0	0	1	II	2	0			2	0
3	Breast cancer		0	53	1	0	1	0	0	1	I	1	1			2	0
4	Breast cancer		0	54	0	0	0	0	0	1	I	3	1			2	0	1	1	0
5	Breast cancer		0	55	1	10	1	0	1	1	II	4	0			0	0	1	1	0
6	Breast cancer		0	48	0	1	1	0	1		II	3	1			2	2	0	0	1
7	Breast cancer		0	48	0	0	0	0	0	1	I	2	1			1	1	1	1	1
8	Breast cancer		0	70	1	0	1	0	0	1	I	2	0			0	0	1	1	0
9	Breast cancer		0	56	1	0	1	0	1	1	II	3	1			2	0	1	1	0
10	Breast cancer		0	49	1	0	0	0	1	1	III	2	0			2	0	1	0	1
11	Breast cancer		0	56	0	0	1	0	1	1	II	2	1			2	2	1	1	0
12	Breast cancer		0	55	1	11	0	0	1	1	I	3	0			2	0	0	0	1
13	Breast cancer		0	61	1	10	0	0	1	1	II	3	1			2	0	1	1	1
14	Breast cancer		0	65	0	0	0	0	1	0	II	3	0			2	0	0	0	1
15	Breast cancer		0	50	1	1	1	0	1	1	I	2	1			2	2	1	1	1
16	Breast cancer		0	51	0	1	1	0	1	1	III	2	1			2	0	1	1	0
17	Breast cancer		0	75	1	0	1	0	0	1	I	1	1			2	0	1	1	1
18	Breast cancer		0	61	0	0	1	0	0	1	I	2	0			2	0	1	1	1
19	Breast cancer		0	73	1	0	1	0	0	1	I	1	0			2	0	1	1	1
20	Breast cancer		0	72	0	0	1	0	0	1	0	2	0			0	0	0	0	1
21	Breast cancer		0	48	1	0	1	0	0		I	1	1			2	0	1	1	0
22	Breast cancer		0	78	1	10	1	0	0	1	I	2	1			2	0	1	1	0
23	Breast cancer		0	65	0	0	1	0	1	1	IV	2	1			2	0	1	1	0
24	Breast cancer		0	55	1	10	0	0	1	1	II	3	0			2	0	1	1	1
25	Breast cancer		0	64	1	1	1	0	0	1	I	1	1			2	0	1	1	1
26	Breast cancer		0	60	1	1	1	0	1	1	II	1	0			2	0	1	1	0
27	Breast cancer		0	61	1	1	1	0	1	1	II	1	1			2	0	1	1	0
28	Breast cancer		0	54	0	1	1	0	1	1	I	3	0			2	0	1	0	0
29	Breast cancer		0	54	1	1	1	0	0	1	I	4	0			2	1	1	1	0
30	Breast cancer		0	49	0	0	1	0	0	1	II	2	0			0	0	1	1
31	Breast cancer		0	38	1	1	1	0	1	1	I	1	1			2	0	1	1	1
32	Breast cancer		0	59	1	0	1	0	0	1	I	2	1			2	0	1	1	1
33	Breast cancer		0	48	1	1	1	0	0	1	I	1	1			2	0	1	1	1
34	Breast cancer		0	61	1	0	1	0	0	1	I	1	1			2	0	1	1	1
35	Breast cancer		0	70	0	0	1	0	0	1	0		1			0	0	1	1	0
36	Breast cancer		0	66	1	0	1	1	1	1	III		1			2	1	1	0	0
37	Breast cancer		0	37	1	0	1	1	1	1	II	2	1			2	0	1	1	1
38	Breast cancer		0	75	1	0	1	0	0	1	II	1	1			2	0	1	1	0
39	Breast cancer		0	67	0	11	1	0	0	1	II	1	1			2	0	1	1	0
40	Breast cancer		0	62	1	1	1	0	0		I	1	0			2	0	1	1	1
41	Breast cancer		0	64	1	1	1	0	0	0	I	2	1			2	0	1	1	1
42	Breast cancer		0	46	0	1	0	0	1	1	I	3	0			2	0	1	1	1
43	Breast cancer		0	69	0	0	1	1	0	1	III	3	0			2	0	1	1	1
44	Breast cancer		0	61	1	0	1	1	1	0	IV	3	1			2	0	0	0	1
45	Breast cancer		0	63	0	0	1	0	0	1	I	2	1			2	0	1	1	0
46	Breast cancer		0	72	1	11	0	0	1	1	IV	1	0			2	0	1	1	0
47	Breast cancer		0	59	0	0	0	0	1	0	I	2	0			2	0	0	0
48	Breast cancer		0	44	0	0	1	0	1	1	II	2	0			2	0	1	1	1
49	Breast cancer		0	59	1	0	0	0	1	0	II	2	0			2	0	1	1	0
50	Breast cancer		0	61	1	0	1	0	1	0	I	3	0			2	0	0	0	0
51	Breast cancer		0	76	1	0	1	0	1	1	I	3	0			2	0	1	0	1
52	Breast cancer		0	50	1	11	1	0	1	1	I		1					0	1	0
53	Breast cancer		0	75	0	0	1	0	0	1	0	3	1			0	0	0	1	1
54	Breast cancer		0	60	1	0	1	0	0	1	0	4	1			0	1	1	1	0
55	Breast cancer		0	67	0	0	0	1	0	1	IV	2	0			2	0	1	1	0
56	Breast cancer		0	69	1	0	1	0	0	1	I	1	1			2	0	1	1	1
57	Breast cancer		0	77	1	0	1	0	0	1	I	2	1			2	0	1	1	0
58	Breast cancer		0	73	0	0	1	0	1	1	II	3	1			2	0	1	1	0
59	Breast cancer		0	34	1	1	1	1	0	1	III	1	1			2	0	1	1	1
60	Breast cancer		0	64	1	10	1	0	1	1	II	2	1			2	0	1	1	1
61	Breast cancer		0	63	1	10	1	0	0	1	I	4	1			2	1	1	1	0
62	Breast cancer		0	58	0	1	1	0	1	1	I	2	1			2	0	1	1	0
63	Breast cancer		0	65	1	1	1	0	0	1	I	1	0			2	1	1	1	0
64	Breast cancer		0	57	1	0	1	0	0	1	I	1	0			2	0	1	1	0
65	Breast cancer		0	71	0	10	1	0	0	1	I	3	1			2	0	1	1	1
66	Breast cancer		0	70	1	0	1	0	1	1	III	3	0			2	0	1	1	0
67	Breast cancer		0	65	1	10	1	0	0	1	0	2	1			0	0	1	1	1
68	Breast cancer		0	61	1	0	1	0	0	1	I	4	0			2	1	1	1	1
69	Breast cancer		0	61	0	0	1	0	0	1	I		0			2	1	1	0	0
70	Breast cancer		0	53	1	0	1	0	0	1	I	3	0			2	0	1	1	0
71	Breast cancer		0	62	0	0	1	0	0		II	2	0			2	0	1	1	1
72	Breast cancer		0	64	0	10	1	0	0		I	1	1			2	0	1	1	1
73	Breast cancer		0	57	1	0	1	0	1	1	II	3	1			2	0	0	1	1
74	Breast cancer		0	42	0	11	1	0	0	1	I	2	1			2	1	1	1	0
75	Breast cancer		0	58	1	1	1	0	0	1	I	1	0			2	0	1	1	0
76	Breast cancer		0	61	1	1	1	0	0	1	I	1	0			2	0	1	0	0
77	Breast cancer		0	64	1	0	1	0	0	1	II	1	0			2	0	1	1	0
78	Breast cancer		0	49	1	0	1	0	0	1	I	1	0			1	0	1	1	0
79	Breast cancer		0	61	0	11	1	0	0		I		1				3	1	1
80	Breast cancer		0	64	1	10	1	0	0	1	I	2	0			2	0	1	1	1
81	Breast cancer		0	41	0	10	1	0	1	1	II	2	0			2	0	1	1	0
82	Breast cancer		0	45	1	1	0	0	0	1	I	2	0			2	0	1	1	1
83	Breast cancer		0	58	1	1	1	0	1	1	III	4	1			0	0	1	1	1
84	Breast cancer		0	57	1	0	1	0	0	1	I	1	1			2	0	1	1	1
85	Breast cancer		0	70	0	0	1	0	0	1	I	2	0			2	0	1	1	1
86	Breast cancer		0	61	1	1	1	0	0	1	0	2	0			0	0	1	1	1
87	Breast cancer		0	63	1	0	1	0	1	1	II	2	1			2	0	1	0	1
88	Breast cancer		0	62	1	10	1	0	0	1	I	2	0			2	0	1	1	0
89	Breast cancer		0	58	1	0	1	0	0	1	I	1	0			2	0	1	1	1
90	Breast cancer		0	72	0	10	0	0	0	1	II	2	0			2	1	1	0	0
91	Breast cancer		0	31	1	1	1	0	0	1	I	3	1			0	0	1	1	0
92	Breast cancer		0	51	1	10	1	0	0	1	I	1	0			2	0	1	1	0
93	Breast cancer		0	54	1	0	1	0	0	1	I	1	1			2	0	1	1	0
94	Breast cancer		0	57	0	1	1	0	0		I	1	0			2	0	1	1	0
95	Breast cancer		0	47	1	1	0	0	0	1	I	1	0			2	0	1	1	0
96	Breast cancer		0	58	0	0	1	0	0	1	I	1	0			2	0	1	1	0
97	Breast cancer		0	70	1	1	1	0	0	1	I	1	1			2	0	1	1	0
98	Breast cancer		0	63	1	1	1	0	0	1	0	2	0			0	0	1	0	1
99	Breast cancer		0	44	1	0	1	0	0	1	I	1	1			2	0	1	1	1
100	Breast cancer		0	78	1	10	1	1	0	0	III	1	1			2	0
101	Breast cancer		0	58	1	0	1	0	1	0	I	3	1			2	0	0	0	1
102	Breast cancer		0	67	1	0	1	0	0	0	0	3	1			0	0	1	1	0
103	Breast cancer		0	69	1	10	0	0	0	1	I	1	1			2	0	1	0	0
104	Breast cancer		0	61	0	1	1	0	0	1	II	1	0			2	0	1	1	1
105	Breast cancer		0	53	0	0	1	0	0	1	I	2	1			2	0	1	1	1
106	Breast cancer		0	61	0	0	1	0	1	0	II	2	0			2	0	0	0	0
107	Breast cancer		0	63	0	10	0	0	1	1	II	3	0			2	0	1	1	1
108	Breast cancer		0	69	0	1	1	0	0	0	I	1	0			2	0	1	0	0
109	Breast cancer		0	65	0	10	1	1	1	0	III	2	0			2	0	0	0	1
110	Breast cancer		0	72	0	0	1	1	1	1	IV	3	0			2	0	1	1	0
111	Breast cancer		0	80	0	1	1	0	0	1	III	2	0			2	0	1	0	0
112	Breast cancer		0	65	0	1	1	1	1	1	III	3	0			2	0	1	1	0
113	Breast cancer		0	55	1	0	1	0	0	1	I	1	1			2	0	1	1	1
114	Breast cancer		0	51	1	1	1	0	0	1	I	1	0			2	0	0	1	0
115	Breast cancer		0	60	1	0	1	0	0	1	I	3	1			2	0	1	0	1
116	Breast cancer		0	63	1	0	1	0	0	1	I	2	1			2	0	1	0	1
117	Breast cancer		0	68	1	0	1	0	0	1	I	4	1			2	1	1	1	1
118	Breast cancer		0	64	1	0	1	0	1	1	III	3	0			2	0	0	1	0
119	Breast cancer		0	53	0	0	1	0	1	1	II	2	1			2	0	1	1	0
120	Breast cancer		0	42	1	0	1	1	1	1	III	3	0			2	0	1	1	0
121	Breast cancer		0	83	0	0	0	0	0	1	I	4	0			2	0	1	1	0
122	Breast cancer		0	62	1	1	1	0		1	II	2	0			2	0	1	0	1
123	Breast cancer		0	39	1	0	1	0	0	1	I	3	1			2	0	1	1	1
124	Breast cancer		0	68	1	1	1	0	0	1	II	1	1			1	0	1	1	0
125	Breast cancer		0	64	0	1	1	0	1	1	III	3	1			2	0	1	0	0
126	Breast cancer		0	63	1	10	1	0	1	1	I	3	0			1	0	1	1	1
127	Breast cancer		0	56	1	10	1	0	1	0	I	3	1			1	2	1	0	0
128	Breast cancer		0	85	1	0	1	0	0	1	I	1	0			1	0	1	1	1
129	Breast cancer		0	59	1	1	1	1	1	1	II	3	0			2	0	1	1	1
130	Breast cancer		0	54	1	1	1	1	1	0	II	3	0			2	0	0	0	0
131	Breast cancer		0	39	0	1	1	1	1	1	I	1	1			2	0	1	1	0
132	Breast cancer		0	50	1	1	1	1		0	II	3	1			2	0	0	0	0
133	Breast cancer		0	57	0	1	1	0	0	1	I	1	1			2	0	1	0	0
134	Breast cancer		0	70	1	0	1	0	1	1	III	1	0					1	1	1
135	Breast cancer		0	63	0	10	1	0	1		II	3	0			2	0	0	0	0
136	Breast cancer		0	62	1	1	1	0	0	1	I	2	0					1	1	0
137	Breast cancer		0	50	0	0	1	0	1	0	III	3	1			2	0	0	1	1
138	Breast cancer		0	64	1	0	1	1	0	1	II	2	1			1	1	1	1	1
139	Breast cancer		0	63	0	0	1	0	0	1	I	2	1			2	0	1	1	0
140	Breast cancer		0	63	0	0	1	0	0	1	I	2	1			1	2	1	1	0
141	Breast cancer		0	59	1	10	1	1	1	0	III	2	0			2	0	0	0	1
142	Breast cancer		0	74	0	1	1	1	0	1	III	2	0			2	0	1	1	0
143	Breast cancer		0	53	1	0	1	0	1	1	I	3	1			2	1	1	1	1
144	Breast cancer		0	42	1	0	1	1	0	0	II	3	0			2	0	0	0	0
145	Breast cancer		0	67	1	1	1	0	0	1	I	2	0			2	0	1	1	0
146	Breast cancer		0	61	1	10	1	0	1	0	III	3	0			2	0	0	0	0
147	Breast cancer		0	65	1	1	1	0	1	0	II	2	1			2	0	0	0	0
148	Breast cancer		0	69	1	0	1	0	1	1	II	2	0			2	1	1	1	0
149	Breast cancer		0	62	1	1	1	0	1	1	I	1	0			1	0	1	1	0
150	Breast cancer		0	57	0	1	1	0	1	1	III	3	1			2	0	1	1	1
151	Breast cancer		0	55	1	0	1	0	1	1	II	2	1			2	0	1	1	0
152	Colorectal cancer		1	62	1	1	1	0	1		IV	2	0
153	Colorectal cancer		1	51	0	1	1	1	1		III	2	1
154	Colorectal cancer		0	75	1	11	1					2	1
155	Colorectal cancer		0	71	0	10	1	0	1		IV	3	0
156	Colorectal cancer		1	57	0	0	1	1			I	1	1
157	Colorectal cancer		1	60	0	1	0	0	1		IV	3	0
158	Colorectal cancer		1	75	0	0	0	0	1		IV	3	0
159	Colorectal cancer		1	76	0	0	1	1	0		III	2	1
160	Colorectal cancer		0	62	1	1	0	0	1		IV	3	0
161	Colorectal cancer		1	59	0	10	1	1	0		II		1
162	Colorectal cancer		0	61	0	0	1	0	1		IV	3	1
163	Colorectal cancer		1	71	0	11	1	1				2	1
164	Colorectal cancer		0	75	0	0		0			III	2	0
165	Colorectal cancer		1	54	1	1	0	0	1		II	3	0
166	Colorectal cancer		1	62	1	1	0	0	1		II	3	0
167	Colorectal cancer		1	66	0	1	0	0	1		III	2	0
168	Colorectal cancer		1	77	0	0	1	1	0		II	2	1
169	Colorectal cancer		1	52	1	0	1	1			III		1
170	Colorectal cancer		0	53	0	0	1	1	1		III		1
171	Colorectal cancer		0	75	0	0	1	0	1		III		0
172	Colorectal cancer		1	68	0	0	0	0	1		III	3	0
173	Colorectal cancer		1	59	1	1	1	1			II	2	1
174	Colorectal cancer		1	53	1	0	0	0	1		III	3	0
175	Colorectal cancer		1	77	0	10	1	1			III	2	1
176	Colorectal cancer		1	74	1	1	1	1	1		III	2	0
177	Colorectal cancer		0	59	1	0	1	1	0		III	2	1
178	Colorectal cancer		0	58	1	0	0	0	1		IV	2	0
179	Colorectal cancer		0	63	1	0	1	0	1		III	2	0
180	Colorectal cancer		0	64	0	0	0	0	0		IV	2	0
181	Colorectal cancer		1	47	1	1	1	1	1		II		1
182	Colorectal cancer		0	42	0	1	1	1	1		IV	2	1
183	Colorectal cancer		0	66	0	0	1	0	1		III	3	0
184	Colorectal cancer		1	73	1	10	1	1	1		IV	3	1
185	Colorectal cancer		1	64	1	1	1	1	1		II	2	1
186	Colorectal cancer		1	75	0	1	0	0	1		III	2	0
187	Colorectal cancer		1	75	1	0	1	0	1		II	3	0
188	Colorectal cancer		1	74	1	1	0	0	1		III	2	0
189	Colorectal cancer		1	64	0	0	1	0	1		II	3	0
190	Colorectal cancer		1	62	1	10	1	0	0		II	2	0
191	Colorectal cancer		1	55	1	0	0	0	1		III	2	0
192	Colorectal cancer		0	56	1	0	1	1	1		II	1	1
193	Colorectal cancer		0	74	1	1	1	1				3	1
194	Colorectal cancer		1	43	1	0	0	0	1		III	1	0
195	Colorectal cancer		1	55	1	0	1	0	1		IV	2	0
196	Colorectal cancer		0	57	1	0	1	1	1		IV	2	0
197	Colorectal cancer		1	62	1	0	1	1	1		II	2	1
198	Colorectal cancer		1	71	0	10	1	1			II		0
199	Colorectal cancer		0	70	0	11	1	1	1		I		0
200	Colorectal cancer		0	66	0	10	0	0	1		IV	3	0
201	Colorectal cancer		1	73	1	10	0	0	1		IV	2	0
202	Colorectal cancer		0	70	1	0	0	0	1		III	2	0
203	Colorectal cancer		1	50	0	0	1	1	1		IV		1
204	Colorectal cancer		1	63	0	1	1	1			III	3	1
205	Colorectal cancer		1	72	0	10	1	0	1		III	3
206	Colorectal cancer		1	58	0	0	1	1	0		II	1	1
207	Colorectal cancer		1	67	1	1	1	1	1		III	3	1
208	Colorectal cancer		0	69		10	0	0	1		II	3	0
209	Colorectal cancer		1	48	0	1	1	1	1		II	2	1
210	Colorectal cancer		1	74	1	0	0	0	1		IV	3	0
211	Colorectal cancer		1	51	0	1	0	0	1		III	2	0
212	Colorectal cancer		0	72	1	0	1	1			II	2	1
213	Colorectal cancer		1	65	0	10	1	1	1		III	2	1
214	Colorectal cancer		1	58	0	10	1	1	1		III	3	1
215	Colorectal cancer		1	64	0	1	1	1	0		II	1	1
216	Colorectal cancer		0	81	0	0	1	1	0		II	3	1
217	Colorectal cancer		1	60	0	1	1	1	1		II		1
218	Colorectal cancer		1	56	1	0	0	1	0		IV	2	0
219	Colorectal cancer		1	58	1	1	1	1	0		III	4	1
220	Colorectal cancer		0	54	1	0	1	1	1		II	1	1
221	Colorectal cancer		1	58	1	0	1	1	0		II	3	1
222	Colorectal cancer		0	70	0	11	0	0	0		II	2	0
223	Colorectal cancer		1	34		1	1	0	1		III	4	0
224	Colorectal cancer		1	48	0	1	1	1	0		II	2	1
225	Colorectal cancer		1	68	0	0	1	1	0		III	2	1
226	Colorectal cancer		1	71	1	0	1	0	1		II	2	0
227	Colorectal cancer		0	73	0	10	1	1	0		II	4	1
228	Colorectal cancer		1	39	0	0	1	1	1		I	2	1
229	Colorectal cancer		1	62	0	1	1	1	0		I	2	1
230	Colorectal cancer		0	59	0	0	0	0	0		II	2	0
231	Colorectal cancer		1	70	1	0	1	1	0		II	2	1
232	Colorectal cancer		1	59	0	1	0	0	1		II	3	0
233	Colorectal cancer		1	70	1	1	1	1	1		II	2	1
234	Colorectal cancer		0	82	0	0	1	0	0			2	1
235	Colorectal cancer		1	73	1	10	0	0	1		III	2	0
236	Colorectal cancer		0	72	0	0	1	0	0		III	2	0
237	Colorectal cancer		0	56	0	0	1	1	1		II	2	0
238	Colorectal cancer		0	46	1	10	1	0	1		III	3	0
239	Colorectal cancer		0	68	0	1	1	0	1		II	1	1
240	Colorectal cancer		1	51	1	1	1	1				1	1
241	Colorectal cancer		0	83	0	0					III	2	0
242	Colorectal cancer		0	68	1	0	1	0	1		III		0
243	Colorectal cancer		0	62	0	0	1	0	1		III	2	1
244	Colorectal cancer		1	65	1	11	1	1	0		III		1
245	Colorectal cancer		0	56	0	0	1	1	0		II	2	1
246	Colorectal cancer		1	48	0	0	1	0	0		I	2	1
247	Colorectal cancer		1	72	0	1	1	1	1		III	2	0
248	Lung cancer		0	62		10	0		1		IV		1	0	0
249	Lung cancer		0	81		10	0		0		IV		1	0	0
250	Lung cancer		1	53		1	0		0		IV		1	0	0
251	Lung cancer		1	64		0	0		0		IV		0		1
252	Lung cancer		0	62		1	1		0				0	0	0
253	Lung cancer		1	78		10	0		0						2
254	Lung cancer		1	62		0	0		0				1		1
255	Lung cancer		1	49		1	0		0						1
256	Lung cancer		1	55		1	1		1		IV		1		0
257	Lung cancer		1	67		1	0		1		IV		0	1	0
258	Lung cancer		1	68		1	1		0		IV		0		1
259	Lung cancer		1	74		1	0		0		IV		1	0	0
260	Lung cancer		1	72		10	0		0				0		1
261	Lung cancer		0	41		11	0		1		IV		1		0
262	Lung cancer		1	73		10	1		0		IV		0	0	0
263	Lung cancer		0	62		1	0		0				1		1
264	Lung cancer		1	80		10	1		0		III		0		0
265	Lung cancer		0	54		1	0		1		IV		0		0
266	Lung cancer		1	70		0	0		1				1		0
267	Lung cancer		1	71		10	1		0		III		0		0
268	Lung cancer		1	50		1	0		1		III		0		0
269	Lung cancer		1	77		10	1		0		IV		1	1	0
270	Lung cancer		1	56		1	0		0		II		0		0
271	Lung cancer		1	79		0	0		0				1		1
272	Lung cancer		0	54		1	0		0				0		1
273	Lung cancer		1	79		0	0		0				0	0	1
274	Lung cancer		0	74		11	1		0		III		0	0	0
275	Lung cancer		0	89		0	0		0		IV		1		1
276	Lung cancer		0	58		1	0		0		IV		0	1	1
277	Lung cancer		1	78		0	0		0		IV				1
278	Lung cancer		1	79		1	0		0				0		1
279	Lung cancer		1	60		10	0		0				0		1
280	Lung cancer		0	57		1	0		0				1	0	0
281	Lung cancer		0	68		0	0		0				0		1
282	Lung cancer		1	72		10	1		1		IV		0		0
283	Lung cancer		1	59		1	0		0		IV		1	0	0
284	Lung cancer		1	69		1	0		0				1		1
285	Lung cancer		1	76		11	1		0		III				0
286	Lung cancer		1	61		1	0		0		IV		1		1
287	Lung cancer		1	63		1	1		1		III		0	1	0
288	Lung cancer		1	75		0	0		0		IV		1		1
289	Lung cancer		1	81		0	0		0		IV		1		1
290	Lung cancer		0	83		0	0		0		III		1	0	0
291	Lung cancer		1	63		1	0		0				1		1
292	Lung cancer		0	82		0	0		0				1		1
293	Lung cancer		0	72		10	1		1		IV		1	0	0
294	Lung cancer		1	65		11	0		0		IV		1		1
295	Lung cancer		1	59		10	0		1		I		1		0
296	Lung cancer		1	42		1	1		1				1		1
297	Lung cancer		1	64		1	0		0				1		1
298	Lung cancer		0	72		0	0		0		III		1	1	0
299	Lung cancer		1	61		1	1		1		III		1	1	0
300	Lung cancer		1	57		0	0		0		III		0		0
301	Lung cancer		1	50		1	1		1		IV		0	1	0
302	Lung cancer		1	56		1	0		0						0
303	Lung cancer		1	57		1	0		0				1		0
304	Lung cancer		1	59		1	1		1		IV		0	0	0
305	Lung cancer		1	57		1	0		0		IV		1		0
306	Lung cancer		1	65		10	1		0		IV		1		0
307	Lung cancer		1	81		1	0		0						1
308	Lung cancer		1	51		1	0		0		III		1	0	0
309	Lung cancer		1	53		1	0		0		IV		0		0
310	Lung cancer		1	84		1	0		0				0		1
311	Lung cancer		1	71		1	0		0				1		1
312	Lung cancer		1	57		1	0		1		I		1		0
313	Lung cancer		1	67		1	0		0				1		0
314	Lung cancer		0	65		10	0		0		III		1		0
315	Lung cancer		0	77		0	0		0				1		1
316	Lung cancer		1	63		1	0		0		IV		1	1	0
317	Lung cancer		1	66		1	0		0		IV		0		0
318	Lung cancer		1	66		1	0		0		IV		0	1	0
319	Lung cancer		1	73		10	0		0		IV		1	1	0
320	Lung cancer		1	76		10	0		0				1	1	0
321	Lung cancer		0	72		0	0		0				1		1
322	Lung cancer		1	76		1	0		0		IV				0
323	Lung cancer		1	49		1	1		1		IV		0		0
324	Lung cancer		1	80		11	1				I	3	0	0
325	Lung cancer		1	75		1	1		1		I	3	1	1	1
326	Lung cancer		0	57		1	1		1		IV	4	1	0	0
327	Lung cancer		1	56		11	1		1		IV	3	1	0	0
328	Lung cancer		1	69		1	1		1		IV	3	1	1	1
329	Lung cancer		1	59		11	1		1		III	2	1	0	0
330	Lung cancer		0	74		1	1				III	4	0	0	0
331	Lung cancer		1	69		10	1		1		IV	3	1	0	0
332	Lung cancer		1	48		10	1		1		IV	3	0		1
333	Lung cancer		0	69		0	1						1	1
334	Lung cancer		0	65		1			1		IV	2	0	0	0
335	Lung cancer		0	78		11	1				III	4	0		1
336	Lung cancer		1	64		10					III	3	0	0	1
337	Lung cancer		1	58		0	1		1		III	3	0	0	1
338	Controls		1	42		0
339	Controls		1	43		0
340	Controls		1	52		1
341	Controls		1	50		0
342	Controls		1	40		0
343	Controls		1	49		10
344	Controls		1	61		0
345	Controls		1	65		0
346	Controls		1	56		0
347	Controls		1	55		0
348	Controls		1	51		1
349	Controls		0	49		0
350	Controls		0	59		1
351	Controls		1	50		0
352	Controls		0	47		1
353	Controls		1	56		1
354	Controls		1	47		10
355	Controls		0	52		0
356	Controls		1	43		0
357	Controls		1	59		0
358	Controls		1	44		1
359	Controls		0	48		0
360	Controls		1	46		1
361	Controls		1	51		0
362	Controls		0	55		0
363	Controls		1	57		1
364	Controls		1	46		0
365	Controls		1	43		1
366	Controls		0	40		0
367	Controls		1	56		0
368	Controls		1	50		0
369	Controls		1	53		0
370	Controls		0	42		1
371	Controls		1	48		0
372	Controls		1	57		0
373	Controls		0	55		1
374	Controls		1	52		10
375	Controls		0	60		1
376	Controls		1	44		0
377	Controls		1	50		0
378	Controls		1	45		0
379	Controls		1	55		10
380	Controls		0	49		10
381	Controls		0	49		0
382	Controls		1	54		1
383	Controls		1	58		1
384	Controls		0	52		10
385	Controls		0	47		0
386	Controls		1	47		0
387	Controls		1	43		0
388	Controls		1	47		0
389	Controls		1	50		0
390	Controls		1	43		0
391	Controls		1	49		0
392	Controls		1	41		0
393	Controls		1	47		10
394	Controls		1	46		1
395	Controls		1	47		1
396	Controls		1	49		1
397	Controls		1	41		1
398	Controls		0	51		0
399	Controls		0	56		0
400	Controls		0	54		0
401	Controls		1	53		0
402	Controls		0	48		0
403	Controls		1	62		0
404	Controls		1	48		0
405	Controls		1	53		1
406	Controls		1	60		0
407	Controls		1	59		1
408	Controls		1	53		0
409	Controls		1	50		1
410	Controls		1	48		1
411	Controls		1	48		0
412	Controls		0	54		0
413	Controls		1	57		0
414	Controls		0	50		1
415	Controls		1	50		10
416	Controls		0	51		11
417	Controls		1	56		0
418	Controls		1	58		10
419	Controls		1	43		1
420	Controls		1	59		1
421	Controls		1	41		0
422	Controls		1	44		0
423	Controls		1	55		1
424	Controls		0	50		0
425	Controls		1	49		10
426	Controls		1	46		0
427	Controls		1	53		1
428	Controls		0	47		0
429	Controls		1	44		0
430	Controls		0	57		10
431	Controls		0	46		0
432	Controls		1	56		10
433	Controls		1	40		0
434	Controls		1	56		1
435	Controls		1	49		1
436	Controls		1	43		1
437	Controls		0	49		0
438	Controls		1	55		1
439	Controls		1	55		10
440	Controls		1	56		1
441	Controls		1	46		10
442	Controls		1	43		1
443	Controls		1	53		0
444	Controls		1	49		1
445	Controls		1	42		0
446	Controls		1	60		0
447	Controls		1	56		0
448	Controls		1	43		0
449	Controls		0	39		0
450	Controls		0	59		1
451	Controls		1	51		0
452	Controls		1	46		1
453	Controls		1	60		0
454	Controls		1	48		1
455	Controls		0	52		1
456	Controls		1	48		0
457	Controls		1	49		0
458	Controls		1	55		10
459	Controls		1	42		1
460	Controls		1	49		0
461	Controls		1	57		0
462	Controls		1	50		0
463	Controls		1	52		0
464	Controls		1	54		0
465	Controls		1	53		0
466	Controls		1	59		0
467	Controls		1	41		0
468	Controls		1	48		0
469	Controls		0	53		0
470	Controls		1	42		1
471	Controls		1	43		0
472	Controls		1	47		1
473	Controls		1	48		0
474	Controls		0	47		1
475	Controls		0	50		0
476	Controls		1	41		0
477	Controls		1	51		0
478	Controls		0	52		0
479	Controls		1	52		0
480	Controls		1	48		0
481	Controls		1	60		0
482	Controls		0	46		1
483	Controls		1	47		0
484	Controls		1	44		0
485	Controls		1	45		11
486	Controls		1	56		0
487	Controls		1	51		0
488	Controls		1	41		11
489	Controls		1	46		11
490	Controls		1	52		1
491	Controls		1	52		1
492	Controls		1	42		1
493	Controls		1	50		1
494	Controls		1	51		1
495	Controls		0	42		0
496	Controls		0	44		0
497	Controls		1	48		0
498	Controls		0	44		0
499	Controls		1	44		0
500	Controls		1	51		0
501	Controls		1	47		10
502	Controls		0	45		10
503	Controls		1	49		10
504	Controls		1	40		0
505	Controls		1	44		0
506	Controls		1	50		0
507	Controls		1	48		10
508	Controls		1	42		1
509	Controls		1	46		0
510	Controls		1	53		0
511	Controls		1	45		1
512	Controls		1	48		0
513	Controls		1	44		0
514	Controls		1	50		1
515	Controls		1	53		10
516	Controls		1	57		1
517	Controls		0	55		0
518	Controls		1	48		1
519	Controls		1	41		0
520	Controls		1	48		10
521	Controls		1	58		1
522	Controls		1	53		10
523	Controls		1	52		0
524	Controls		0	55		0
525	Controls		1	43		0
526	Controls		1	54		0
527	Controls		1	46		10
528	Controls		1	51		0
529	Controls		1	52		1
530	Controls		1	56		0
531	Controls		0	48		0
532	Controls		1	44		0
533	Controls		0	39		0
534	Controls		0	43		0
535	Controls		1	45		0
536	Controls		0	42		0
537	Controls		1	55		10
538	Controls		0	45		0
539	Controls		0	56		1
540	Controls		1	52		10
541	Controls		1	53		0
542	Controls		1	59		1
543	Controls		0	56		0
544	Controls		1	45		0
545	Controls		1	52		10
546	Controls		1	46		0
547	Controls		0	60		0
548	Controls		0	64		0
549	Controls		0	38		0
550	Controls		1	68		10
551	Controls		1	65		0
552	Controls		0	55		0
553	Controls		0	75		0
554	Controls		0	86		0
555	Controls		0	87		0
556	Controls		0	81		0
557	Controls		0	85		1
558	Controls		0	78		0
559	Controls		0	61		0
560	Controls		0	74		0
561	Controls		0	67		0
562	Controls		1	78		0
563	Controls		0	79		0
564	Controls		0	62		0
565	Controls		0	47		10
566	Controls		0	83		0
567	Controls		0	67		0
568	Controls		0	78		10
569	Controls		0	79		0
570	Controls		0	93		0
571	Controls		1	73		1
572	Controls		1	53		10
573	Controls		1	82		0
574	Controls		1	78		10
575	Controls		0	44		1
576	Controls		0	63		0
577	Controls		0	86		10
578	Controls		0	56		0
579	Controls		1	86		0
580	Controls		1	87		0
581	Controls		0	51		0
582	Controls		0	84		0
583	Controls		1	54		1
584	Controls		1	84		11
585	Controls		0	58		0
586	Controls		0	86		0
587	Controls		0	68		0
588	Controls		0	70		0
589	Controls		1	74		0
590	Controls		0	62		0
591	Controls		0	86		0
592	Controls		0	75		0
593	Controls		0	69		0
594	Controls		0	77		0
595	Controls		0	87		0
596	Controls		0	83		0
597	Controls		0	61		1
598	Controls		0	84		0
599	Controls		0	72		0
600	Controls		1	79		0
601	Controls		0	81		0
602	Controls		1	57		1
603	Controls		1	86		0
604	Controls		0	62		0
605	Controls		1	68		11
606	Controls		1	74		0
607	Controls		1	62		1
608	Controls		0	76		0
609	Controls		0	78		0
610	Controls		1	82		1
611	Controls		0	84		0
612	Controls		0	83		0
613	Controls		0	78		0
614	Controls		0	47		1
615	Controls		0	87		0
616	Controls		0	85		0
617	Controls		1	80		0
618	Controls		0	83		0
619	Controls		0	75		0
620	Controls		0	85		0
621	Controls		0	77		0
622	Controls		0	28		0
623	Controls		1	74		1
624	Controls		0	78		0
625	Controls		1	80		1
626	Controls		0	76		0
627	Controls		1	80		1
628	Controls		0	81		0
629	Controls		1	77		1
630	Controls		1	79		1
631	Controls		0	86		0
632	Controls		1	82		1
633	Controls		0	85		0
634	Controls		0	52		11
635	Controls		1	68		10
636	Controls		1	60		1
637	Controls		0	75		0
638	Controls		0	63		0
639	Controls		0	91		0
640	Controls		0	80		0
641	Controls		0	80		1
642	Controls		0	64		0
643	Controls		0	93		0
644	Controls		0	83		0
645	Controls		0	56		0
646	Controls		0	84		0
647	Controls		0	37		0
648	Controls		0	67		0
649	Controls		0	78		0
650	Controls		0	84		0
651	Controls		0	36		1
652	Controls		0	69		10
653	Controls		0	89		0
654	Controls		0	70		1
655	Controls		0	61		10
656	Controls		0	57		0
657	Controls		0	53		0
658	Controls		0	49		0
659	Controls		0	48		1
660	Controls		0	35		0
661	Controls		0	33		0
662	Controls		0	30		1
663	Controls		0	30		1
664	Controls		0	44		0
665	Controls		0	26		0
666	Controls		0	48		1
667	Controls		0	25		1
668	Controls		0	46		0
669	Controls		0	19		0
670	Controls		0	41		0
671	Controls		0	50		1
672	Controls		0	57		10
